# Supplementary material for: Preparation and Performance Study of HTPB-g-(PNIPAM/PEG) Thermoresponsive Polymer Brush
Source: MDPI journal article supplement (doi:10.3390/polym16091248), 2024-04-29
Supplement: s1 [file s1]

## Supplementary Materials

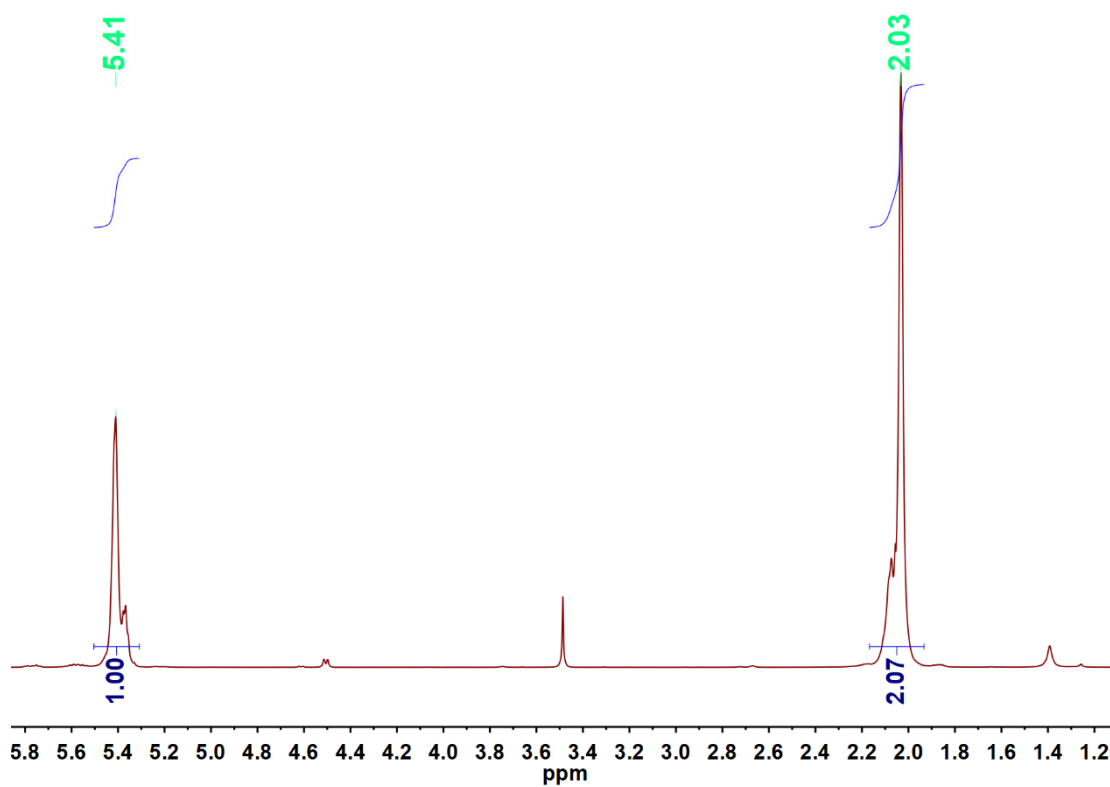

Figure S1. <sup>1</sup>H NMR spectrum of HTPB in CDCl<sub>3</sub>.

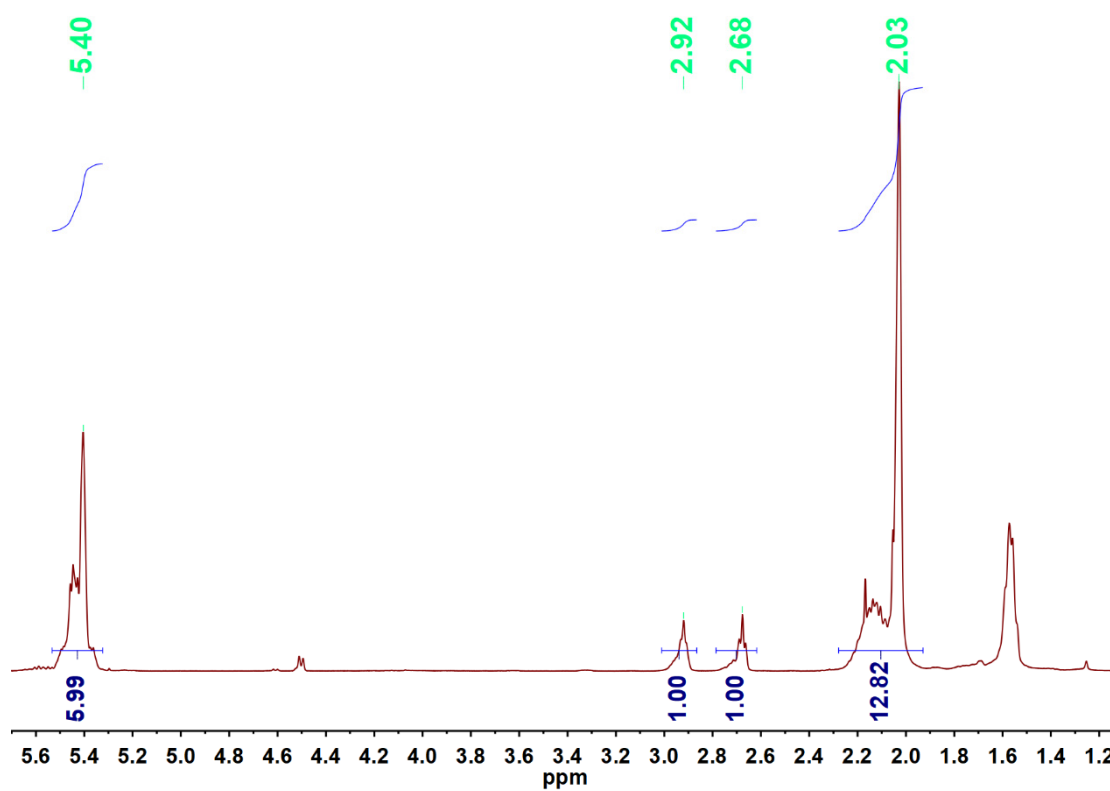

Figure S2. <sup>1</sup>H NMR spectrum of EHTPB in CDCl<sub>3</sub>.

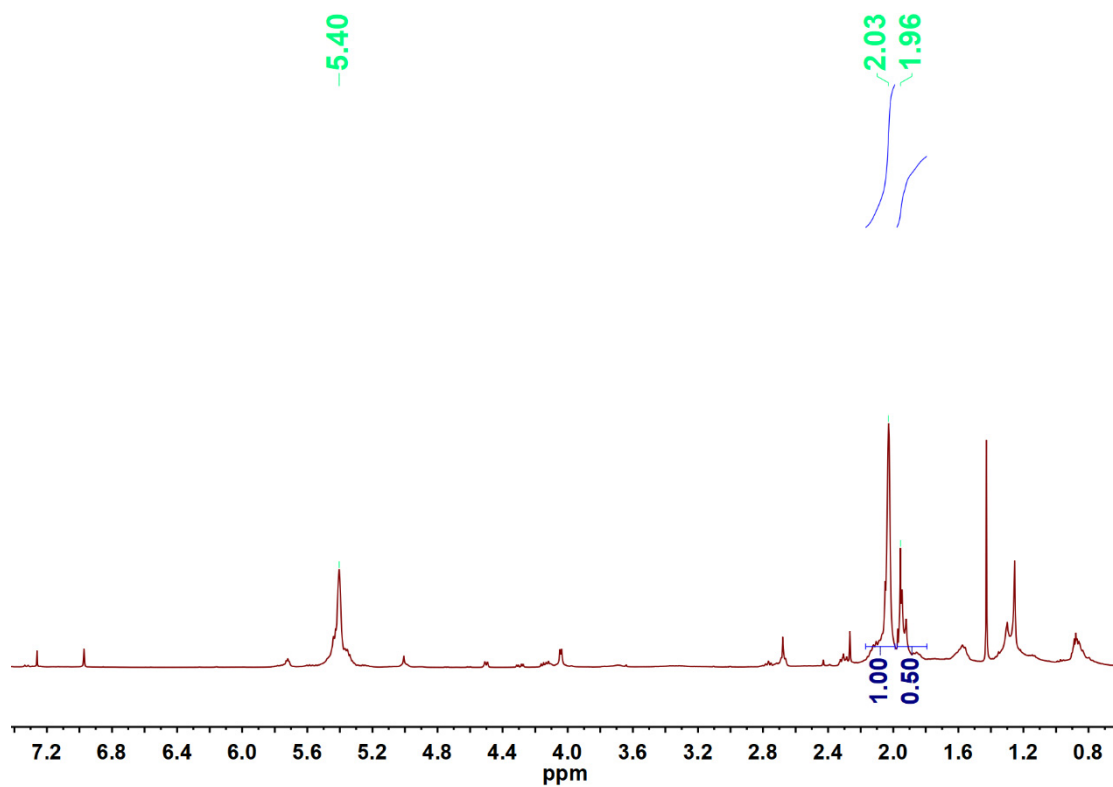

Figure S3. <sup>1</sup>H NMR spectrum of N<sub>3</sub>-HTPB-Br in CDCl<sub>3</sub>.

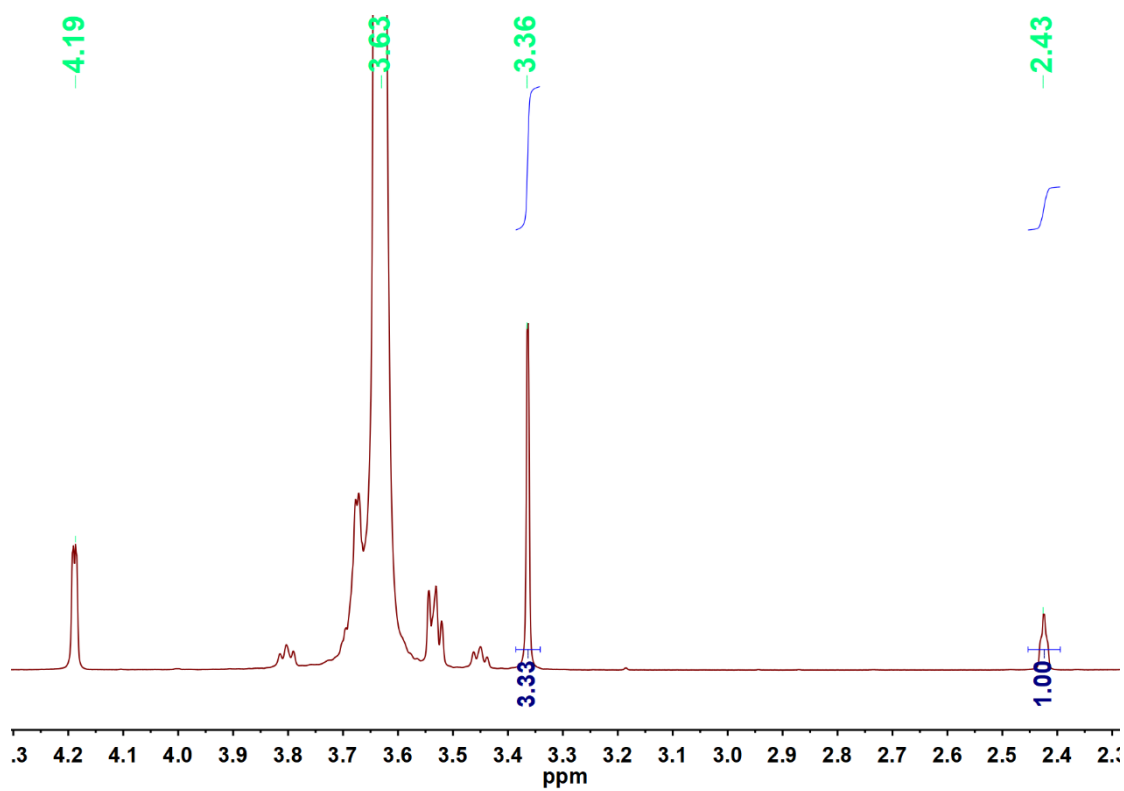

Figure S4. <sup>1</sup>H NMR spectrum of mPEG-Alk in CDCl<sub>3</sub>.

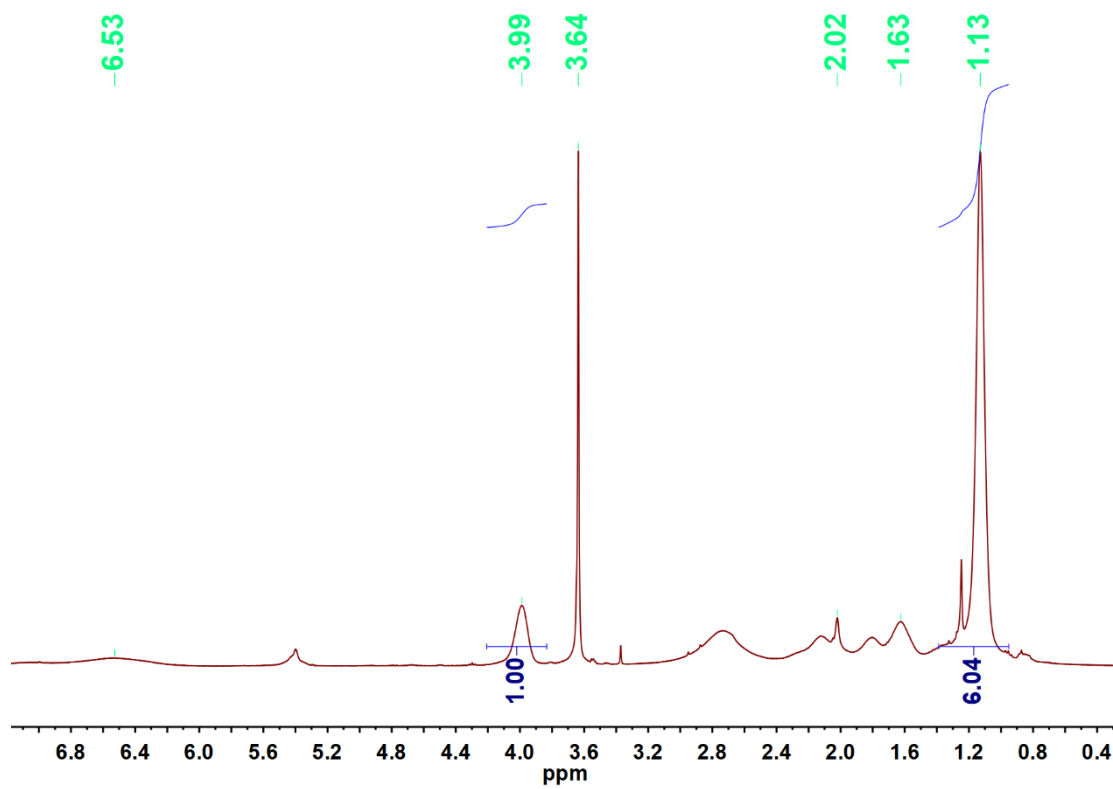

Figure S5.  $^1\text{H}$  NMR spectrum of HTPB-g-(PNIPAM/PEG) in  $\text{CDCl}_3$ .
